# Supplementary material for: A multiomics comparison between endometrial cancer and serous ovarian cancer
Source: PeerJ. 2020 Jan 9;8:e8347. doi: 10.7717/peerj.8347 (PMC6955105; doi:10.7717/peerj.8347)
Supplement: Table S1 [file peerj-08-8347-s001.xlsx]

## Sheet: Sheet1
Uterine-specific	Ovary-specific
LOC440128	ASIP
CASP14	FLJ42957
LOC402461	TTC16
LOC401308	TOR2A
AADACL2	SOX17
C1orf186	WT1
LOC399788	WT1
UPK3B	WT1
UPK3B	WT1
UPK3B	LOC387745
LOC440536	PDLIM4
IGFL1	LOC440688
FOXL2	LOC90133
LOC400701	IQGAP3
C10orf48	LMX1B
OXTR	RPL14L
C11orf47	SLC34A2
PKHD1L1	FLJ35429
TDRD10	CLDN6
AMY2B	PAEP
SERPINB4	HIST1H2BG
RNF183	LRFN1
GBP4	CDH6
IFIH1	WFDC2
DDIT4L	WFDC2
FGF2	WFDC2
LOC338918	WFDC2
GPR115	WFDC2
GATA5	LOC253264
KCNMB1	LOC390919
FLJ39075	LOC253013
FLJ20035	MELL1
PTGIS	LHX1
ESR1	ALOX12P2
AHCTF1	LOC146439
HOXA11	SIGLEC11
RAB23	ZNF286
RAB23	EIF3S12
DGKQ	FOXL2
APOL3	SNX6
APOL3	SNX6
APOL3	n/a
APOL3	SEMA3D
APOL3	EMID2
APOL3	FLJ14054
IFI44L	KLK5
MYOCD	DOK5
GBP5	DOK5
HOXB4	FST
MGST2	FST
LOC339210	MEOX1
NDP	MEOX1
ARNTL2	TNFRSF10A
LGR5	DPT
SUPV3L1	SLC4A11
LOC148898	ARX
LOC148898	COL13A1
MSX1	COL13A1
	COL13A1
	COL13A1
	COL13A1
	COL13A1
	COL13A1
	COL13A1
	COL13A1
	COL13A1
	COL13A1
	COL13A1
	COL13A1
	COL13A1
	COL13A1
	COL13A1
	COL13A1
	COL13A1
	COL13A1
	ATP5J2
	ATP5J2
	ATP5J2
	ISL2
	ZNF77
	KLK7
	KLK7
	TSHR
	PFC
	MSLN
	MSLN
	LOC374569
	KIAA1210
	ABCB6
	GPR39
	FCGRT
	TSGA13
	NMU
	ATP6V0E
	MMP10
	HAND2
	LOC400550
	BMP6
	NXF3
	SPON1
	TJP3
	FOLR1
	FOLR1
	FOLR1
	FOLR1
	FOLR1
	FOLR1
	VTCN1
	ZNF92
	C10orf13
	ZNF92
	KIT
	HRASLS
	RPL14
	n/a
	CDAN1
	CILP
	KLK10
	ESPN
	KLK10
	MRPL41
	PLEKHF1
	FLJ12571
	COL9A1
	SOCS1
	COL9A1
	FLJ11078
	FZD7
	ZNF503
	DKFZP564O0523
	ADAM28
	ADAM28
	SLC39A4
	SLC39A4
	CCDC8
	CRABP1
	VIT
	LOC130576
	RPL38
	ADAMTS15
	XKR8
	FLJ22269
	LOC441027
	CLCF1
	OLFML2A
	FLJ14466
	FLJ22833
	PRIMA1
	PRIMA1
	UPK1B
	PCMTD1
	Beta4GalNAc-T4
	GATA6
	HSD11B1
	HSD11B1
	LOC441378
	PVT1
	TYSND1
	n/a
	SIM2
	SIM2
	NRP2
	NRP2
	NRP2
	NRP2
	NRP2
	NRP2
	STX1A
	WTIP
	FKSG24
	GATA4
	SNCG
	SOCS3
	CRISPLD1
	SERTAD3
	SERTAD3
	PAX8
	PAX8
	PAX8
	PAX8
	PAX8
	EMILIN3
	TMPRSS13
	LIN28
	SN
	GAB2
	GAB2
	CISH
	n/a
	BIVM
	SFXN4
	SFXN4
	SFXN4
	C14orf4
	C11orf43
	DHCR24
	PRPF31
	RTN4R
	ISLR
	ISLR
	STYXL1
	SPINT2
	KLK11
	KLK11
	IGFBP2
	TMEM100
