# Supplementary material for: A multiomics comparison between endometrial cancer and serous ovarian cancer
Source: PeerJ. 2020 Jan 9;8:e8347. doi: 10.7717/peerj.8347 (PMC6955105; doi:10.7717/peerj.8347)
Supplement: Table S2 [file peerj-08-8347-s002.xlsx]

## Sheet: commonSurvival_genes_table
symbol	entrezID	Endometroid_EC_CoxPH_adjust-p-value	Serous-like_EC_CoxPH_adjust-p-value	Endometroid_EC_log-rank_adjust-p-value	Serous_EC_log-rank_adjust-p-value	Prognostic trend
SRD5A1	6715	0.00126859	0.000440082	0.0182	0.08511	bad
KRT23	25984	0.0385973	0.00175709	0.07065	0.00645	bad
PHKA1	5255	0.00509848	0.00314119	0.02646	0.00323	bad
GJB7	375519	0.00367702	0.00371332	0.17949	0.03152	bad
SIX1	6495	0.0119304	0.00574195	0.00881	0.01491	bad
GRPEL2	134266	0.00420121	0.00829788	0.1279	0.00012	bad
CD3EAP	10849	0.00444122	0.0111395	0.10369	0.17064	bad
LRRC55	219527	0.0456642	0.0118322	0.11266	0.13163	bad
CPS1	1373	0.0435064	0.0128641	0.0629	0.4593	bad
C1RL	51279	0.00248705	0.0192449	0.06245	0.07385	bad
CXCL3	2921	0.00932655	0.0195234	0.04704	0.01813	bad
ASNS	440	0.0370398	0.0195624	0.15229	0.09683	bad
ZFHX4	79776	0.0351263	0.022307	0.15249	0.19677	bad
BEST2	54831	0.0328564	0.0231554	0.07081	0.04095	bad
IGFBP5	3488	0.00610215	0.0254516	0.0882	0.02173	bad
SORBS2	8470	0.00550758	0.0269982	0.30639	0.78764	bad
ABCA9	10350	0.0415699	0.0277652	0.06883	0.00913	bad
KCNJ13	3769	0.0350899	0.0279031	0.12544	0.00976	bad
CHST4	10164	0.0186344	0.0287167	0.02414	0.15479	bad
BCORL1	63035	0.0243872	0.0293559	0.07199	0.18366	bad
STX19	415117	0.0123088	0.0304369	0.08544	0.08485	bad
PYROXD2	84795	0.00272294	0.0309274	0.01143	0.27768	bad
RNF165	494470	0.0378086	0.0310184	0.6518	0.14797	bad
HMGXB3	22993	0.0296467	0.0346702	0.11517	0.04377	bad
ST6GALNAC1	55808	0.0340261	0.0352962	0.06982	0.3835	bad
YWHAQ	10971	0.0294271	0.0405616	0.13286	0.0929	bad
FZD10	11211	0.00359823	0.0407397	0.00379	0.1125	bad
SKAP1	8631	0.0111998	0.0415989	0.07024	0.00808	bad
TSPAN1	10103	0.0384437	0.0436438	0.04324	0.073	bad
SLC2A11	66035	0.0254964	0.0438728	0.33438	0.31115	bad
IL18R1	8809	0.0429953	0.0465062	0.14479	0.01105	bad
KIAA2022	340533	0.00115927	0.0469595	0.11004	0.13571	bad
ZBTB7C	201501	0.0223047	0.0482029	0.32746	0.04362	bad
NFIB	4781	0.042717	0.0484191	0.43692	0.16626	bad
CCR8	1237	0.00905745	0.0492038	0.20781	0.03594	bad
FCGBP	8857	0.0223873	0.0499868	0.02064	0.17665	bad
SIM1	6492	0.00860425	0.010552	0.01099	0.01698	good
CLCN2	1181	0.0454081	0.0107558	0.09683	0.23492	good
SLBP	7884	0.0244513	0.0134754	0.13983	0.02815	good
DDX39	10212	0.0482655	0.0144996	0.58953	0.02795	good
ASNA1	439	0.0272909	0.0172377	0.07627	0.10665	good
LSG1	55341	0.00982938	0.021165	0.16891	0.03814	good
DNAJC9	23234	0.00874166	0.0232686	0.1494	0.11071	good
TRAIP	10293	0.0258671	0.0258694	0.22216	0.00489	good
C16orf5	29965	0.0444221	0.0290201	0.05844	0.02001	good
CKS1B	1163	0.0120621	0.0292429	0.18522	0.01709	good
CXCR5	643	0.00862784	0.0305868	0.04734	0.09202	good
CCNE1	898	0.0238267	0.0366963	0.00616	0.10589	good
GTF2E2	2961	0.00111078	0.0385399	0.01002	0.66431	good
LEPROTL1	23484	0.0479794	0.0387138	0.13068	0.18025	good
SNRPB	6628	0.00325652	0.0409441	0.03319	0.09873	good
ABCA17P	650655	0.000323286	0.0421724	0.07896	0.16648	good
C19orf52	90580	0.0467198	0.0434097	0.02456	0.03244	good
DUSP9	1852	0.00533975	0.0445914	0.00563	0.14899	good
KLRB1	3820	0.000800058	0.0490646	0.16781	0.23448	good
ACTL6A	86	0.00379246	0.0493643	0.10324	0.10436	good
